# Supplementary material for: Aggregation behavior of polystyrene-b-poly(acrylic acid) at the air–water interface
Source: Royal Society of Chemistry journal article supplement (doi:10.1039/c2sm26797g), 2012-10-24
Supplement: c2sm26797g.pdf [file c2sm26797g.pdf]

# Aggregation behavior of polystyrene-*b*-poly(acrylate acid) at the air-water interface

Xiaolu Wang<sup>a,b</sup>, Xiaoyan Ma<sup>\*a,b</sup> and Duyang Zang<sup>a</sup>

<sup>a</sup> Key Laboratory of Space Applied Physics and Chemistry, Ministry of Education, Shaanxi province, School of Science, Northwestern Polytechnical University, Xi'an 710072, China. Fax: +86-29-88491826; Tel: +86-29-88431676; E-mail: m\_xiao\_yana@nwpu.edu.cn

<sup>b</sup> Key laboratory of Polymer science and technology, Shaanxi province, School of Science, Northwestern Polytechnical University, Xi'an 710072, China.

## Materials

Styrene (St, Tianjin Fuchen Chemical Reagents Co., A.R) was purified and vacuum-distilled prior to use. Acrylic acid (AA, Tianjin Fuchen Chemical Reagents Co., A.R) was vacuum-distilled and dehydrated. Benzyl dithiobenzoate (Advanced Technology & Industrial Co., Ltd.) was used as received. Zaodiisobutyronitrile (AIBN, Shanghai Shanpu Chemical Reagents Co., C.R) was purified by recrystallization and dried before use. N,N-dimethylformamide (DMF, Tianjin Fuyu fine Chemical Reagents Co., A.R) was dehydrated before use.

## Polymerization Process

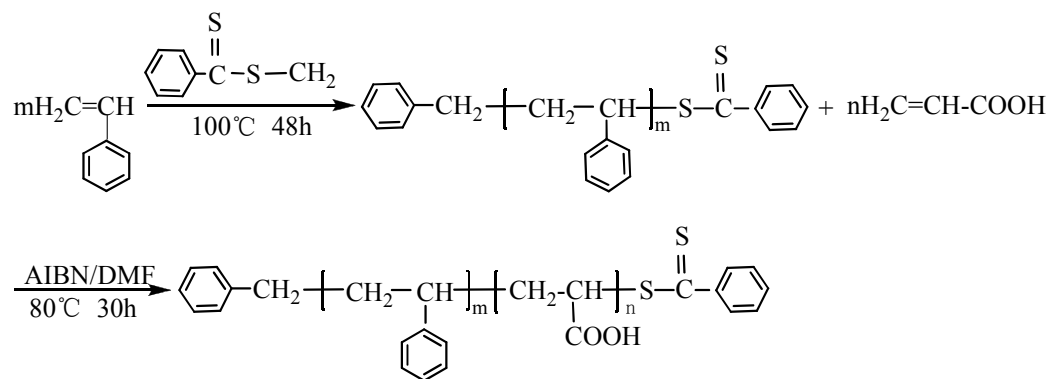

Figure S1. The process for synthesis of PS-*b*-PAA block copolymer.

## Results

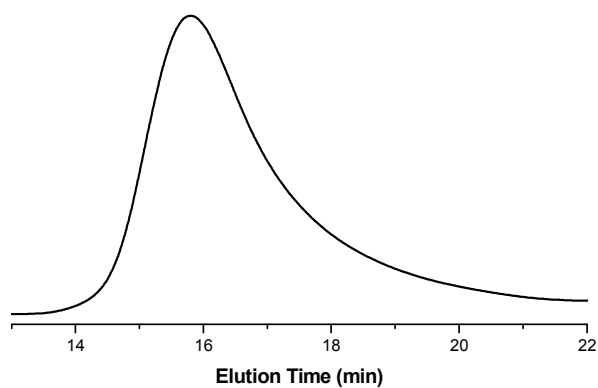

Figure S2. The GPC spectra of the PS macro-initiator measured in THF.

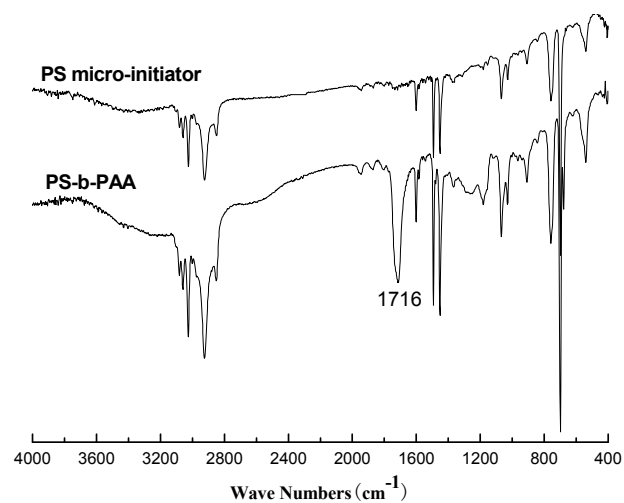

Figure S3. The FT IR spectra of the PS macro-initiator and block copolymer.

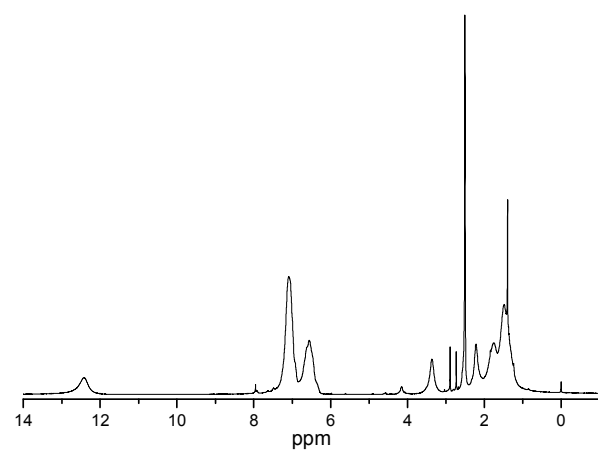

Figure S4. The <sup>1</sup>H NMR spectra of block copolymer measured in DMSO.

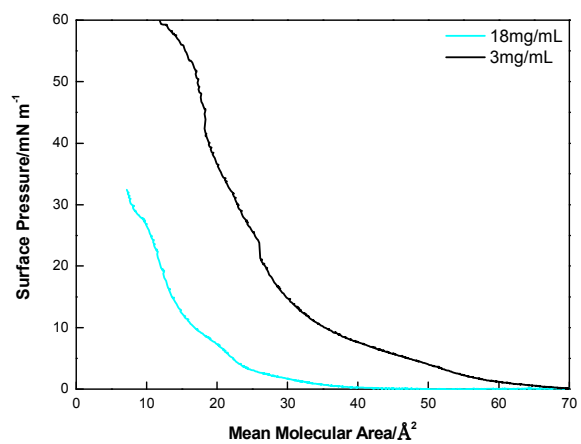

Figure S5. Compression isotherms of the PS-*b*-PAA copolymer at air-water interface, obtained from different spreading concentrations (3mg/mL, 18mg/mL)
